# Supplementary material for: Triazole-modified chitosan: a biomacromolecule as a new environmentally benign corrosion inhibitor for carbon steel in a hydrochloric acid solution
Source: Royal Society of Chemistry journal article supplement (doi:10.1039/c9ra00986h), 2019-01-01
Supplement: c9ra00986h1.pdf [file c9ra00986h1.pdf]

## Triazole-modified Chitosan: A biomacromolecule as a new environmentally benign corrosion inhibitor for carbon steel in a hydrochloric acid solution

Dheeraj Singh Chauhan<sup>1\*</sup>, M.A. Quraishi<sup>1\*\*</sup>, A.A. Sorour<sup>1</sup>, S.K. Saha<sup>2</sup>, P. Banerjee<sup>2</sup>

<sup>1</sup>Center of Research Excellence in Corrosion, Research Institute, King Fahd University of Petroleum and Minerals, Dhahran 31261, Saudi Arabia

<sup>2</sup>Surface Engineering & Tribology Group, CSIR-Central Mechanical Engineering Research Institute, Mahatma Gandhi Avenue, Durgapur 713209, West Bengal, India.

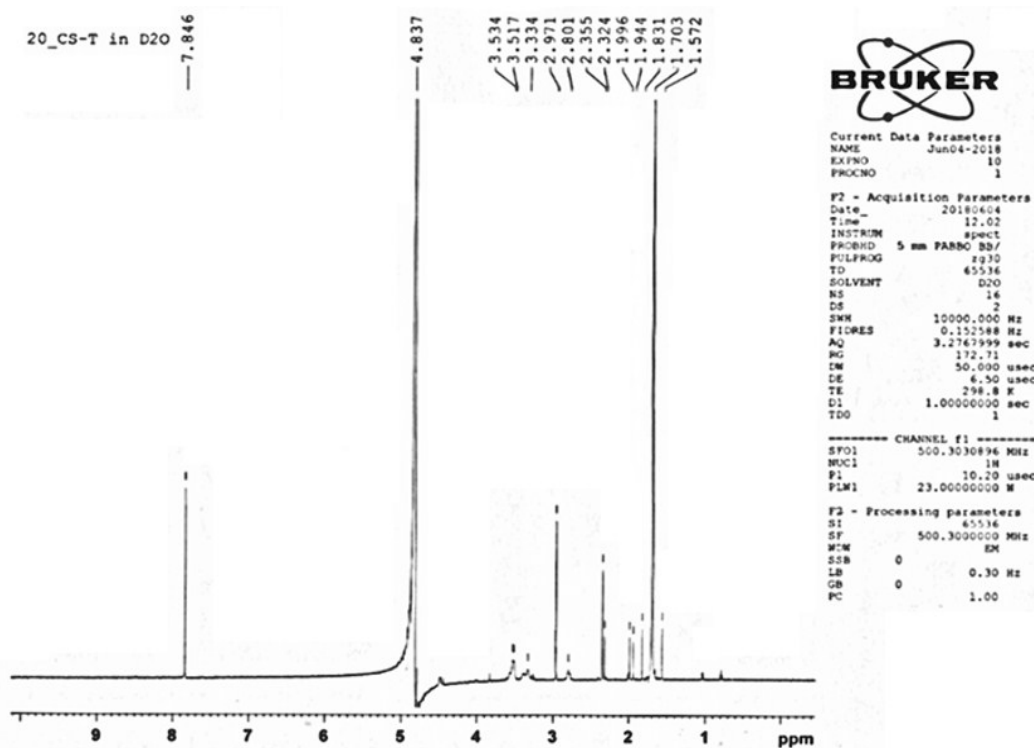

Figure S1 <sup>1</sup>H NMR spectrum of CS-AMT
